# Supplementary material for: The Microtubule-Depolymerizing Activity of a Mitotic Kinesin Protein KIF2A Drives Primary Cilia Disassembly Coupled with Cell Proliferation
Source: PubMed Central journal article supplement — Cell Rep. Author manuscript; Available in PMC 2016 Nov 7. (PMC5099117; doi:10.1016/j.celrep.2015.01.003), 2015-02-05

**A**

| TALENs        | Target sequences                                    | TALEN RVD sequences                                |
|---------------|-----------------------------------------------------|----------------------------------------------------|
| KIF2A-TALEN-L | 5'-TACTGCTAGACCAGTGGAAACTATATTTGAAAGGGGAATGGCTAC-3' | NG NI HD NG NN HD NG NI NN NI HD HD NI HD NG NI NN |
| KIF2A-TALEN-R | 5'-GTAGCCATTCCTTTCAAATATAGTTCCACTAGTGGTCTAGCAGTA-3' | NN NG NI NN HD HD NI NG NG HD HD HD HD NG NG       |

TALEN binding sequences are underlined.

**B**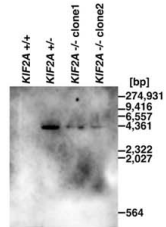**C**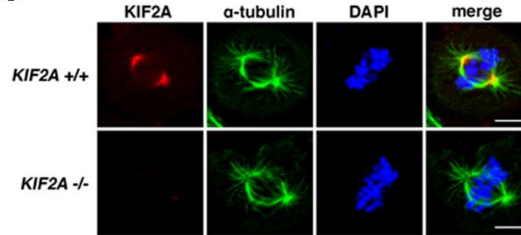**D**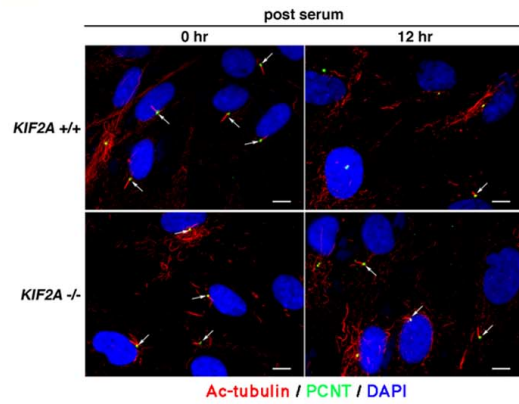**E**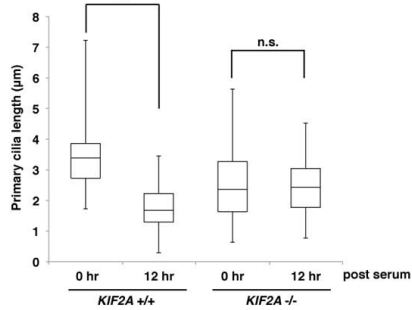**H**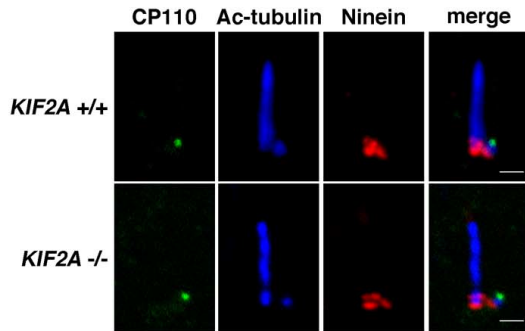**F**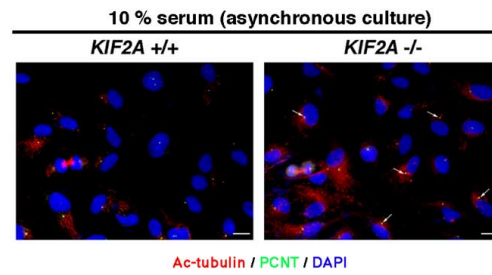**G**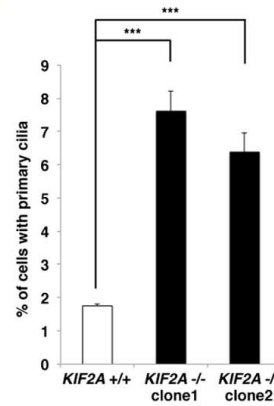**I**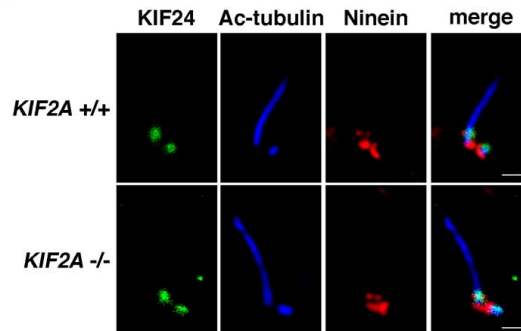

Supplement: NIHMS824070-supplement-Supplement_1-Figure_3.pdf [file NIHMS824070-supplement-Supplement_1-Figure_3.pdf]
