# Supplementary figures and images for: The Microtubule-Depolymerizing Activity of a Mitotic Kinesin Protein KIF2A Drives Primary Cilia Disassembly Coupled with Cell Proliferation
Source: PubMed Central journal article supplement — Cell Rep. Author manuscript; Available in PMC 2016 Nov 7. (PMC5099117; doi:10.1016/j.celrep.2015.01.003), 2015-02-05

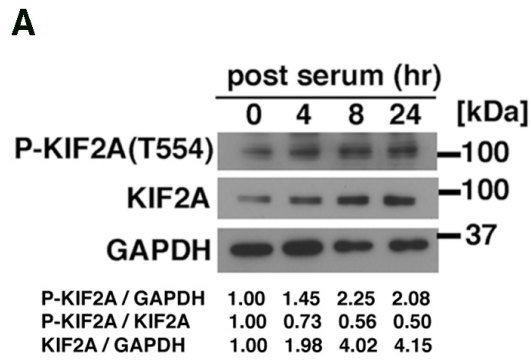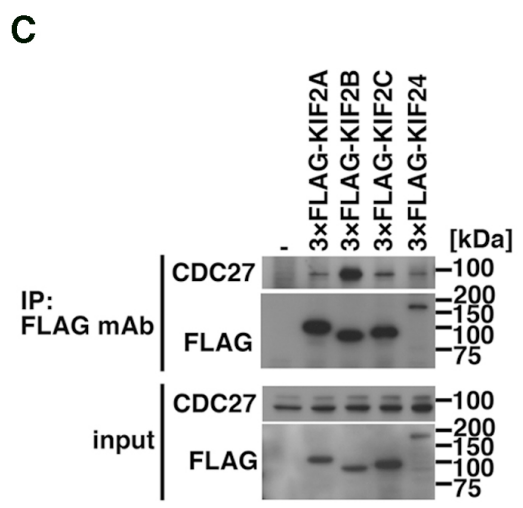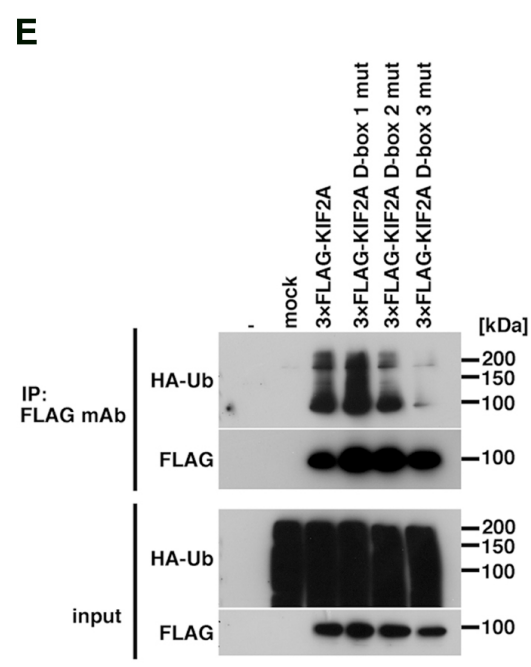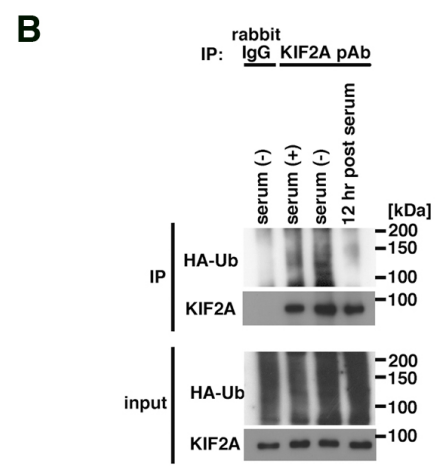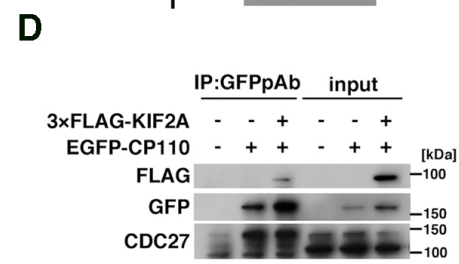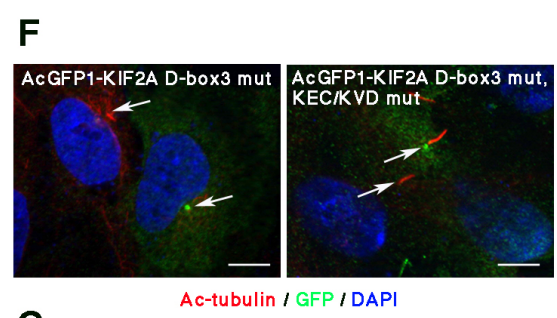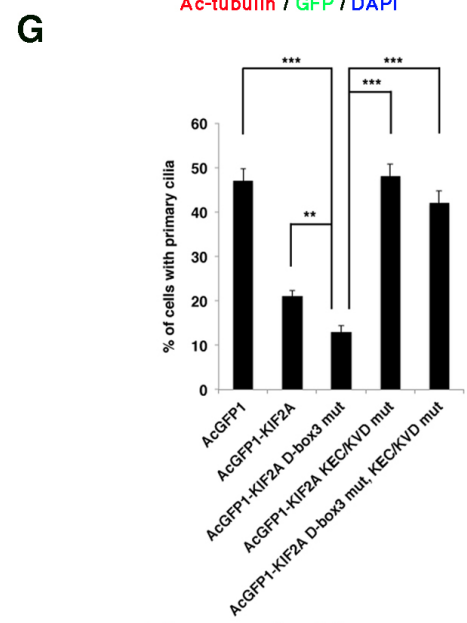

Supplementary Figure 1. Miyamoto *et. al.*

Supplement: NIHMS824070-supplement-Supplement_1-Figure_1.pdf [file NIHMS824070-supplement-Supplement_1-Figure_1.pdf]

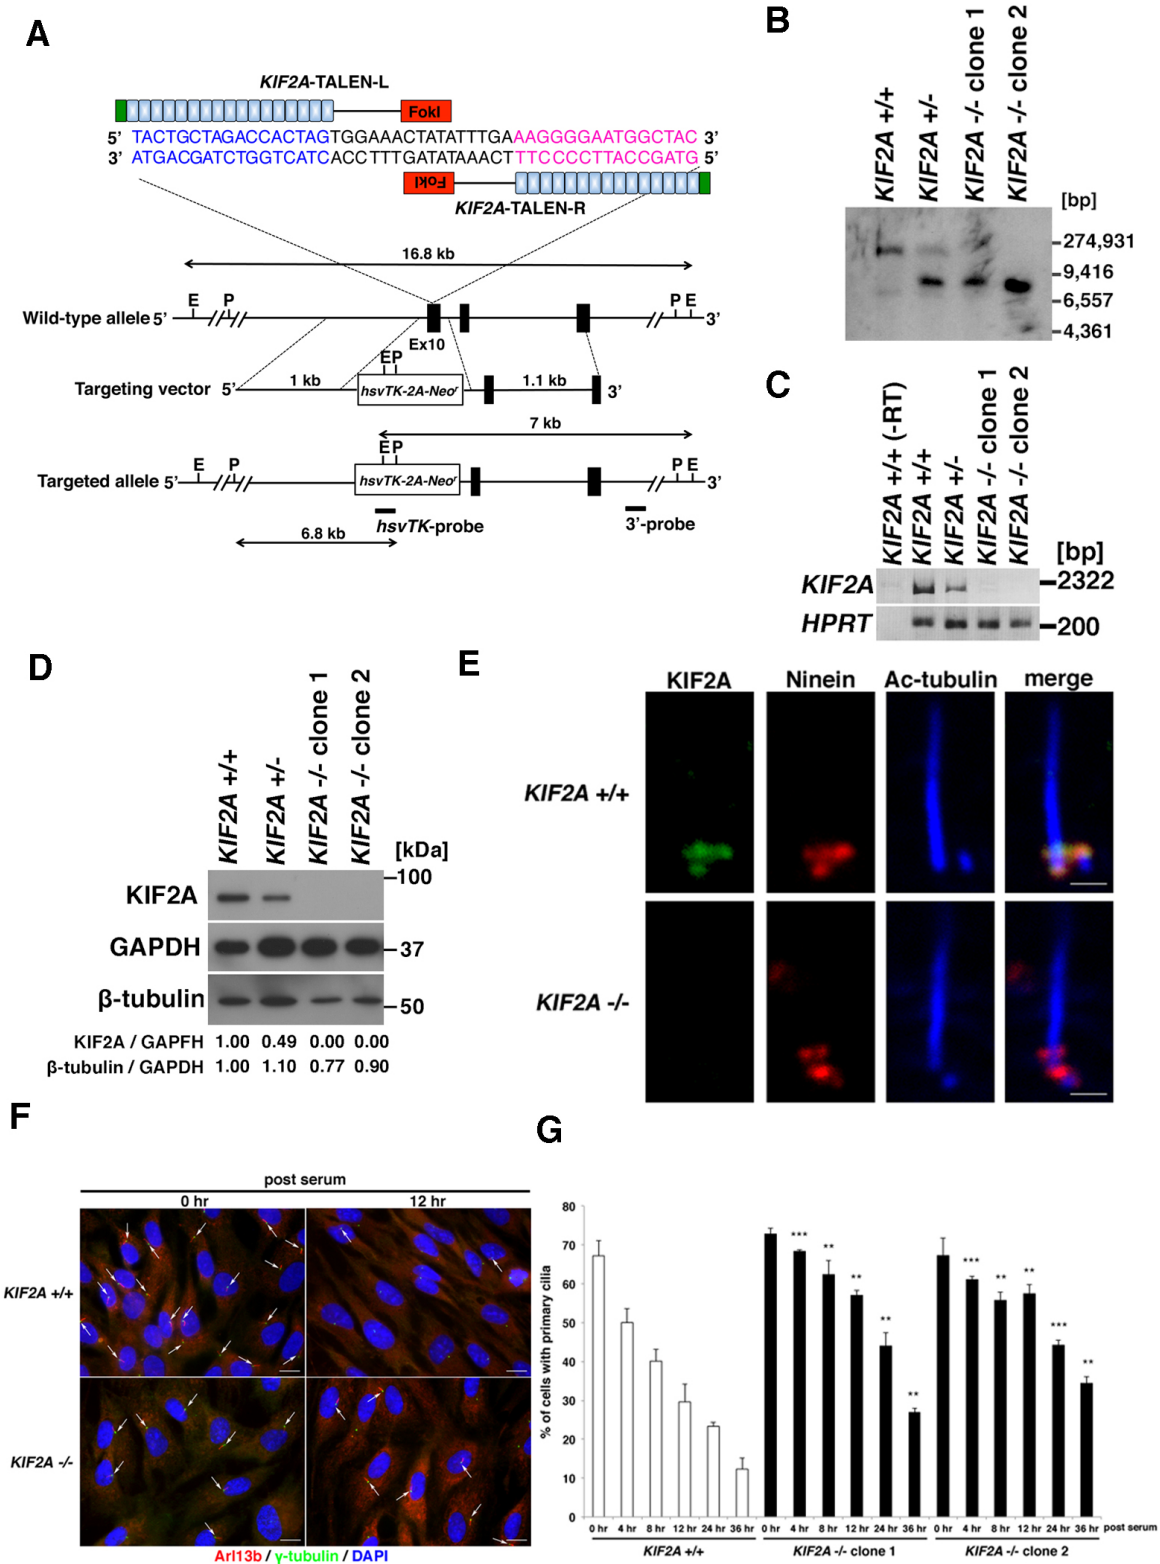

Supplementary Figure 2. Miyamoto *et al*

Supplement: NIHMS824070-supplement-Supplement_1-Figure_2.pdf [file NIHMS824070-supplement-Supplement_1-Figure_2.pdf]

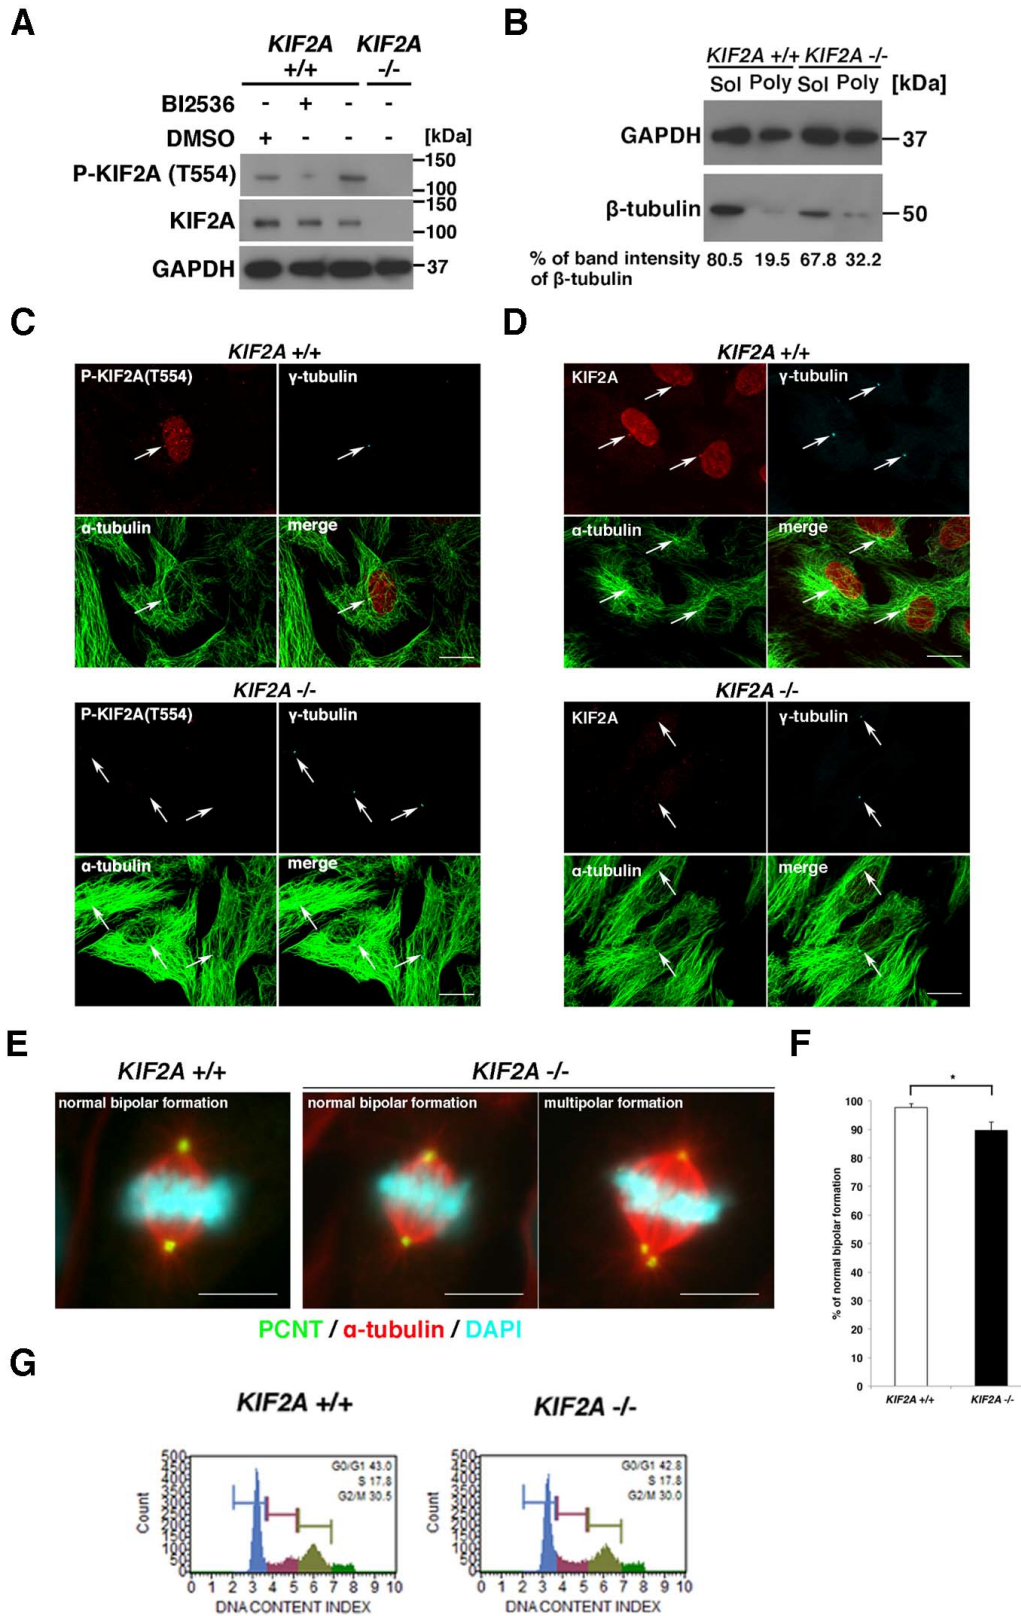

Supplementary Figure 4. Miyamoto *et al.*

Supplement: NIHMS824070-supplement-Supplement_1-Figure_4.pdf [file NIHMS824070-supplement-Supplement_1-Figure_4.pdf]
